# Supplementary material
Source: Springer Nature journal article supplement (https://www.springermedizin.de/resource/supplementary/12889_2005_309_MOESM5_ESM.pdf/9500814)

Femoral Neck  
BMD change  
( $\text{g}/\text{cm}^2/\text{year}$ )

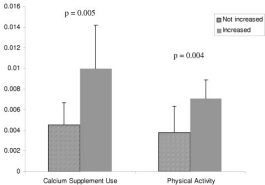

Supplement: MOESM5 [file 9500814]
